1 **Maternal stress promotes offspring growth without oxidative costs in wild red squirrels**

2

3 Ben Dantzer<sup>1,2</sup>, Freya van Kesteren<sup>1</sup>, Sarah E. Westrick<sup>1</sup>, Stan Boutin<sup>3</sup>, Andrew G. McAdam<sup>4</sup>,

4 Jeffrey E. Lane<sup>5</sup>, Robert Gillespie<sup>6</sup>, Ariana Majer<sup>7</sup>, Mark Haussmann<sup>7</sup>, Pat Monaghan<sup>6</sup>

5

6 <sup>1</sup>Department of Psychology, University of Michigan, MI 48109 Ann Arbor, Michigan, USA

7 <sup>2</sup>Department of Ecology and Evolutionary Biology, University of Michigan, MI 48109, Ann

8 Arbor, Michigan, USA

9 <sup>3</sup>Department of Biological Sciences, University of Alberta, Edmonton, Alberta, Canada T6G 2E9

10 <sup>4</sup>Department of Integrative Biology, University of Guelph, Guelph, Ontario, Canada N1G 2W1

11 <sup>5</sup>Department of Biology, University of Saskatchewan, Saskatoon, SK S7N 5E2, Canada

12 <sup>6</sup>Institute of Biodiversity, Animal Health and Comparative Medicine, College of Medical,

13 Veterinary and Life Sciences, University of Glasgow, Glasgow, G12 8QQ, UK

14 <sup>7</sup>Department of Biology, Bucknell University, Lewisburg, PA, 17837, USA

15

16 \*Corresponding author: [dantzer@umich.edu](mailto:dantzer@umich.edu)

17

## 18 **Abstract**

19 Elevations in glucocorticoid levels (GCs) in breeding females (often called “maternal stress”)  
20 may induce adaptive shifts in offspring life histories. Offspring produced by mothers with  
21 elevated GCs may be better prepared to face harsh environments where a faster pace of life is  
22 beneficial. We examined how experimentally elevated GCs in pregnant or lactating North  
23 American red squirrels (*Tamiasciurus hudsonicus*) affected offspring growth in body mass,  
24 structural (skeletal) size, oxidative stress levels (balance of two antioxidants and one measure of  
25 oxidative protein damage) in three different tissues (blood, heart, liver), and liver telomere  
26 lengths. We predicted that offspring from mothers treated with GCs would grow faster but would  
27 also have higher levels of oxidative stress and shorter telomeres, which may predict reduced  
28 longevity. Offspring from mothers treated with GCs during pregnancy grew (in body mass) 17%  
29 faster than those from controls, whereas offspring from mothers treated with GCs during  
30 lactation grew 34.8% slower than those from controls. Treating mothers with GCs during  
31 pregnancy or lactation did not alter the oxidative stress levels or telomere lengths of their  
32 offspring, and fast-growing offspring did not have higher oxidative stress levels or shorter  
33 telomere lengths. Our results indicate that elevations in maternal GCs may induce plasticity in  
34 offspring growth without oxidative costs to the offspring that might result in a shortened  
35 lifespan.

36

## 37 **Introduction**

38 Parents can have long-lasting impacts on their offspring across a diversity of taxa. These  
39 parental or maternal effects have drawn substantial interest because they suggest that parental  
40 characteristics or the parental environment itself could induce adaptive shifts in offspring traits

41 that prepare them for specific environments (i.e., adaptive transgenerational phenotypic  
42 plasticity: 1-4). Furthermore, changes in maternal hormone levels, especially glucocorticoids  
43 (GCs, are widely suspected to act as a mediator of transgenerational phenotypic plasticity in  
44 vertebrates (6-7)

45 GCs are metabolic hormones released by the hypothalamic-pituitary-adrenal (HPA) axis  
46 (8), in response to a variety of ecologically salient cues. In mammals, studies in laboratory  
47 animals (9, 10) and in humans (11, 12) show that elevated maternal GCs (often colloquially  
48 termed “maternal stress”) can generate stable individual differences in offspring physiology and  
49 behaviour through the transfer of maternally-derived GCs to offspring across the placenta (10,  
50 12), in milk (13, 14), or through changes in maternal behaviour (15-17). Maternal GCs could  
51 also act as an internal cue for offspring to modify their own development (18). Regardless of the  
52 pathway, there is much evidence that changes in maternal GCs mediate parental effects whose  
53 influence may even persist across generations via epigenetic mechanisms (19).

54 Some of these changes in offspring caused by elevations in maternal GCs are suspected  
55 to reflect adaptive plasticity in offspring life history traits, such as modifying the trade-off  
56 between early life growth and lifespan (20-21). Maternal stress may induce a “faster” life history  
57 strategy whereby offspring produced by mothers with elevated GCs grow or develop faster (4,  
58 22). Such adjustments in the “pace of life” may be adaptive, as fast postnatal growth or a quicker  
59 developmental time may be beneficial when the risk of extrinsic mortality is heightened (23-24).  
60 However, this increased investment in postnatal growth is expected to carry costs for offspring  
61 longevity whereby fast-growing individuals exhibit a shortened lifespan (25-28).

62 Identifying if maternal stress induces a trade-off between growth and lifespan in wild  
63 animals is needed, as any costs of maternal stress may be masked by benign environmental

64 conditions in the laboratory. Accurately documenting lifespan in wild animals remains  
65 challenging in many species and the stochastic nature of mortality in wild animals may obscure  
66 any mechanistic costs of maternal stress. Consequently, one way to examine if maternal stress  
67 induces a trade-off between growth and longevity in wild animals is to examine how it affects  
68 the possible underlying mechanisms of reduced longevity or physiological correlates that may  
69 predict a shortened lifespan. The free-radical theory of aging (29) provides one framework to  
70 examine the mechanisms by which maternal stress may induce this trade-off between offspring  
71 growth and longevity. Reactive oxygen species (ROS) produced during aerobic respiration can  
72 have damaging effects on cells (29-30). ROS production may be elevated by increased aerobic  
73 respiration due to enhanced investment in growth or reproduction (28, 31-33) or by increased  
74 GCs (34-37). Antioxidants produced by individuals (enzymatic antioxidants such as superoxide  
75 dismutase) as well as those antioxidants from the external environment (non-enzymatic  
76 antioxidants in the diet) can lessen the impact of ROS production (38). An important type of  
77 oxidative damage occurs to the protective ends of chromosomes, called telomeres. Telomeres are  
78 the repetitive DNA sequences that occur at the ends of eukaryote chromosomes whose length is  
79 shortened during each cell division (39-40) and may also be reduced by the increased production  
80 of ROS (28, 41-43). When telomeres reach a specific length, those cells become senescent and  
81 stop dividing unless the enzyme telomerase, or another elongation process, is produced to  
82 elongate the telomeres (44-45). Telomere length or rate of loss has been found to be predictive  
83 (but perhaps not causal: 46) of the mortality risk of individuals (47-51), though the strength of  
84 this relationship may vary among taxa and in relation to other life history traits. Furthermore,  
85 avian or mammalian species with longer lifespans have been shown to exhibit slower age-  
86 specific rates of telomere loss (52-55).

87           Maternal stress may, therefore, induce a life history trade-off between offspring growth  
88 and longevity because offspring may experience elevated oxidative damage, decreased  
89 antioxidant levels, and/or shortened telomeres either due to oxidative stress or increased cell  
90 division associated with elevated growth (20, 28, 56-58). Previous studies across taxa show that  
91 maternal stress can shorten telomere lengths in offspring (37, 59-61) or increase their rate of  
92 attrition as they age (57), which could cause or be associated with a shortened lifespan. For  
93 example, experimental studies in captive and wild birds show that offspring that had exogenous  
94 GCs added to their eggs or GCs given during chick growth had a heightened physiological stress  
95 response, higher levels of oxidative stress, and shorter telomeres early in life (37, 61). Despite  
96 much interest in this topic, few studies in wild animals have examined if experimental elevations  
97 in the GCs of breeding females impact the oxidative state of offspring or explicitly tested the  
98 prediction that elevations in the GCs of breeding females increases early life growth.  
99 Additionally, few studies have tested whether elevated GCs in breeding females or fast early life  
100 growth comes at some cost by promoting oxidative stress and shortening telomeres in offspring.

101           We tested the hypothesis that elevations in maternal GCs would promote a faster life  
102 history strategy in wild North American red squirrels (*Tamiasciurus hudsonicus*). We treated  
103 females with GCs using a protocol that allowed us to increase circulating GCs within a  
104 physiologically-relevant range (62). We treated females with GCs either during pregnancy or  
105 lactation to assess if the timing of exposure to maternal GCs influenced their effects on offspring.  
106 Other than for offspring growth in body mass, we did not have strong *a priori* expectations of  
107 how the timing of maternal stress would differentially impact offspring because elevated  
108 maternal GCs during pregnancy or lactation can impact offspring through the same pathways:  
109 direct transfer of maternal GCs to offspring across the placenta or through milk

110 (“programming”), altering maternal behaviour, or affecting offspring behaviour (see references  
111 above). However, based upon our previous study (4), we predicted that offspring produced by  
112 mothers treated with GCs during pregnancy would grow faster in body mass. We did not have an  
113 *a priori* expectation for how treating mothers with GCs during lactation would impact offspring  
114 growth in body mass, though results from a previous study suggested that it should reduce  
115 growth (17).

116 We measured offspring postnatal growth in body mass prior to weaning (~1 to 25 d of  
117 age) and subsequently obtained measures of oxidative stress when pups were weaned (~70 d of  
118 age). In three tissues (liver, heart muscle, and blood) collected from weaned offspring, we  
119 measured one enzymatic antioxidant (superoxide dismutase), one type of non-enzymatic  
120 antioxidant (total antioxidant capacity), and one type of oxidative damage (protein damage  
121 measured via protein carbonyls). We used multiple tissues because other studies have  
122 highlighted how experimental manipulations can have tissue-specific effects (63). To assess the  
123 cumulative impact of elevated maternal GCs on the oxidative state of offspring and how  
124 offspring growth impacted telomere lengths, we also measured telomere lengths in DNA from  
125 the liver. Although we only measured telomere lengths in one tissue, previous studies indicate  
126 that telomere lengths measured in one somatic tissue are strongly correlated with those in others  
127 (64).

128 We predicted that offspring from mothers treated with GCs during pregnancy would  
129 grow quicker in body mass after birth but would experience more oxidative stress (manifested as  
130 a reduction in antioxidants and an increase in oxidative damage) and decreased telomere length,  
131 which would be a result of increased oxidative stress or increased cell division associated with  
132 faster growth. Because we have previously found that female red squirrels can ameliorate the

133 trade-off between offspring number and growth (4; 65), we examined if elevated maternal GCs  
134 altered the trade-off between litter size and offspring growth or structural (skeletal) size. Because  
135 early life exposure to GCs may modify the direction and strength of the association between two  
136 variables (66-67), we also examined if increases in maternal GCs affected the expected negative  
137 relationship between offspring growth and oxidative stress state (33) by assessing the statistical  
138 interaction between offspring growth and maternal treatment.

139

## 140 **Materials and Methods**

### 141 *Study area & measuring offspring growth*

142 We conducted this study as a part of a long-term study of red squirrels in the Yukon,  
143 Canada that takes place on the traditional territory of the Champagne and Aishihik First Nations.  
144 Squirrels in our study population were all marked individually with unique ear tags and  
145 combinations of coloured wire threaded through the ear tags (68). Females in our study  
146 population usually produce one litter in the spring and rarely produce more than one litter of  
147 offspring to weaning per year (69). Females were captured and handled every ~3 to 21 d to  
148 assess reproductive status through abdominal palpation and nipple condition. Pups were accessed  
149 from the nest two times. The first nest entry occurred immediately after parturition and the  
150 second nest entry occurred when pups were approximately 25 d of age. At both nest entries, pups  
151 were briefly removed from their nest, sexed, and weighed to the nearest 0.01 g using a portable  
152 balance. At the first nest entry, we marked them uniquely by obtaining a small ear biopsy (for  
153 later paternity analyses) and then we permanently marked pups at the second nest entry with  
154 unique metal ear tags. Because offspring growth in body mass during this period of time is  
155 approximately linear (70), we estimated offspring growth as the change in body mass from the

156 first to second nest entry divided by the total number of days elapsed between the two measures  
157 of body mass. At the second nest entry, we measured zygomatic arch width and right hind foot  
158 length to the nearest 1 mm using digital callipers or a ruler, respectively.

### 159 *Maternal treatments*

160 We used four separate treatment groups to assess the effects of elevated maternal GCs on  
161 offspring over four different years (2012, 2015-2017), although in 2012 we only collected  
162 growth in body mass data. Individual females were treated with GCs either during pregnancy or  
163 lactation (“Pregnancy GCs” and “Lactation GCs”), whereas other females were treated as  
164 controls during pregnancy or lactation (“Pregnancy Controls” or “Lactation Controls”). We  
165 increased maternal GCs either during pregnancy or lactation using an established experimental  
166 protocol (4, 62). Briefly, we treated females in the Pregnancy GCs (n = 42 litters) and Lactation  
167 GCs (n = 18 litters) treatment groups with exogenous cortisol (hydrocortisone, Sigma H4001)  
168 dissolved in peanut butter and wheat germ mixture (8 g of peanut butter, 2 g of wheat germ).  
169 Females in the Pregnancy Control (n = 30 litters) or Lactation Control (n = 17 litters) treatment  
170 groups were fed the same amount of peanut butter and wheat germ mixture but lacking the  
171 cortisol. GC treatments were prepared by dissolving hydrocortisone in 1 mL of 100% ethanol  
172 and then 5 mL of 100% peanut oil before allowing the emulsion to sit overnight so that the  
173 ethanol could evaporate. The following morning, the hydrocortisone emulsion was thoroughly  
174 mixed with the appropriate amount of peanut butter and wheat germ, weighed out into individual  
175 dosages (~10 g each), placed into an individual container, and then frozen at -20 °C until  
176 provisioning to the treated squirrels.

177 Each day during the treatment period, we placed individual dosages into a bucket that  
178 was hung ~7-10 m off the ground on the centre of the squirrel’s territory. Squirrels defend these



179 buckets from all other conspecifics and heterospecifics (62), so we can, therefore, be confident  
180 that the squirrels that were given these treatments were consuming them. This procedure causes  
181 long-term elevation of circulating cortisol levels and faecal glucocorticoid metabolite levels (62).  
182 Additional details are provided in the electronic supplementary material (ESM).

### 183 *Tissue sample collection*

184 Pups are weaned when they are approximately ~70 d of age and generally stay on their  
185 natal territory until dispersal soon after (71). When juvenile squirrels were ~70 d of age, they  
186 were euthanized and tissues (liver and cardiac muscle) were immediately removed, rinsed with  
187 PBS buffer, snap frozen on dry ice, and then stored in liquid nitrogen or in a -80 °C freezer until  
188 analysis. Trunk blood was collected through decapitation and then centrifuged at 10,000 g for 10  
189 min at room temperature to separate plasma and red blood cells.

### 190 *Haematocrit*

191 We measured packed red blood cell volume (haematocrit) as a measure of body condition  
192 where higher levels correspond to better body condition (72). Before pups were euthanized, we  
193 collected a blood sample from the hind claw into a heparinized capillary tube. Haematocrit was  
194 quantified using a micro-capillary reader after centrifuging blood samples at 10,000 g for 10 min  
195 at room temperature.

### 196 *Protein carbonyls*

197 We measured oxidative damage to proteins (73) using the protein carbonyl colorimetric  
198 kit by Cayman Chemical (Ann Arbor, USA). Briefly, ~200 mgs of cardiac muscle or liver were  
199 homogenized in ~1000 µL of 50mM MES buffer containing 1mM EDTA using a sonicator, and  
200 then centrifuged at 10,000 g for 15 min at 4 °C. The protein concentration of tissue homogenate  
201 supernatant and plasma samples was measured prior to the assay using a Biotek Take3 protocol

202 (Biotek, Vermont, USA) and samples were diluted in PBS buffer to give a protein range between  
203 1-10 mg/ml, as recommended by the manufacturer. The average intra-assay CV for samples for  
204 plasma, heart, or liver were 1.2%, 2.8%, and 1.6%, respectively. Inter-assay CVs for a red  
205 squirrel pooled sample run on repeat assays for plasma (n = 7 assays), heart (n = 6), or liver (n =  
206 7) were 3.5%, 9.0%, and 8.3%, respectively. We also ran a positive control (oxidized bovine  
207 serum albumin) in two different assays and the inter-assay CV was 3.1%.

#### 208 *Superoxide Dismutase*

209 We obtained one measure of the levels of enzymatic antioxidants (73) by quantifying  
210 levels of superoxide dismutase (SOD) using the SOD kit from Cayman Chemical. SOD was  
211 expressed as units/mg/ml protein (quantified using a Biotek Take3 protocol). Red blood cells  
212 were lysed as per the manufacturer's protocol. The average intra-assay CV for samples for  
213 RBCs, heart, or liver were 2.3%, 4.7%, and 3.1%, respectively. Inter-assay CVs for a red squirrel  
214 pooled sample run on repeat assays for RBCs (n = 10 assays), heart (n = 2), or liver (n = 4) were  
215 16.9%, 4.6%, and 6.5%, respectively.

#### 216 *Total Antioxidant Capacity*

217 We obtained one measure of the levels of non-enzymatic antioxidants (73) by quantifying  
218 total antioxidant capacity (TAC) using the TAC kit from Cayman Chemical. Plasma was diluted  
219 in assay buffer and assayed according to the manufacturer's protocol. Liver and cardiac muscle  
220 (~47 mg) were separately homogenized in 250  $\mu$ L PBS using a sonicator and the supernatant was  
221 diluted in assay buffer and used in the assay. The average intra-assay CVs for samples for  
222 plasma, heart, or liver were 4.7%, 3.2%, and 4.7%, respectively. The inter-assay CVs for  
223 standards run on all the plates for plasma (n = 5 assays) was 15.8% whereas the inter-assay CV

224 for a red squirrel pooled sample run on repeat for heart (n = 8) or liver (n = 2) were 15.4% and  
225 5.4%, respectively.

## 226 *Telomeres*

227 Liver telomere lengths were measured using the telomere restriction fragment (TRF)  
228 assay following established methods (74). Briefly, 2 to 10 g slices of liver tissue were  
229 homogenized in cell lysis solution and proteinase K (Qiagen, Germantown, USA). DNA was  
230 extracted from the liver homogenates and resuspended in buffer. The resuspended DNA was  
231 restriction digested with 15 U of HinfI, 75U of HaeIII and 40U of RsaI (New England BioLabs,  
232 Ipswich, USA) at 37°C. DNA was then separated using pulsed field electrophoresis at 14°C for  
233 19 hours followed by in-gel hybridization overnight at 37°C with a radioactively labeled  
234 telomere-specific oligo (CCCTAA)<sub>4</sub>. Hybridized gels were placed on a phosphorscreen  
235 (Amersham Biosciences, Buckinghamshire, UK), which was scanned on a Typhoon Imager  
236 (Amersham Biosciences). Densitometry in ImageJ (v. 1.51s) was used to determine the position  
237 and the strength of the radioactive signal in each of the lanes compared with the molecular  
238 marker (Quick-Load 1 kb DNA Extend DNA Ladder; New England BioLabs) to calculate  
239 telomere lengths for each sample. Inter-gel variation was accounted for by calculating the mean  
240 TRF length of standard samples run on each gel.

## 241 *Statistical analyses*

242 We assessed the effects of maternal treatments on offspring growth in body mass and a  
243 single measure of size using separate linear mixed-effects models (LMMs) for pregnancy and  
244 lactation treatments. Each of the four LMMs included a fixed effect for maternal treatment and  
245 covariates (sex, year, birth date, litter size) that could impact offspring growth or size. We  
246 included a two-way interaction term between treatment and litter size to identify if elevations in

247 maternal GCs altered the trade-off between litter size and offspring growth, as shown previously  
248 for offspring growth (4). We included a two-way interaction between treatment and sex to assess  
249 if the treatments had sex-specific effects on growth and size, as documented in other species  
250 (75). We used a principal component analysis (PCA) using a covariance matrix in the R package  
251 *ade4* (version 1.7-13, 76) to generate a composite score of offspring size. The first principal  
252 component axis (PC1, hereafter size) explained 69.8% of the variation in offspring size as  
253 measured by zygomatic arch width and hind foot length. Both zygomatic arch width (0.71) and  
254 hind foot length (0.71) loaded positively on PC1, indicating that larger PC1 scores corresponded  
255 to offspring with longer hind feet and wider crania. Due to repeated observations on the same  
256 litters, we included random intercept term of litter ID in these models.

257       Oxidative stress reflects an imbalance between antioxidants and the production of ROS  
258 that can damage proteins, lipids, or DNA (73). Consequently, the effects of our treatments on  
259 measures of antioxidants should not be viewed in absence of their effects on our measures of  
260 oxidative damage (77). We used a PCA to create a composite variable that reflected the oxidative  
261 state of an offspring. The PCA was composed of the two antioxidants (SOD, TAC) and one  
262 measure of oxidative damage (PCC). We conducted a separate PCA (using a correlation matrix)  
263 for each tissue type using the package *ade4*. For some individuals, we were missing measures of  
264 TAC (heart:  $n = 3$ ; plasma:  $n = 2$ ) or PCC (heart:  $n = 2$ ; plasma:  $n = 4$ ) so we substituted average  
265 values for the PCA.

266       Low scores for Blood PC2, Heart PC2, or Liver PC1 corresponded to squirrels that were  
267 exhibiting oxidative stress as they represented lower levels of the two antioxidants (SOD, TAC)  
268 for blood and liver tissue or just one antioxidant (SOD) for heart tissue and, for heart tissue,  
269 higher levels of protein damage (PCC, Table S1). We used these composite variables describing

270 oxidative state of each tissue, haematocrit, or telomere length as the response variables in  
271 separate LMMs. Each of these LMMs contained a fixed effect for maternal treatment and  
272 offspring sex, year, birth date, and litter size. Because offspring growth may impact oxidative  
273 stress levels or telomere lengths (28), we included a two-way interaction term between treatment  
274 and offspring growth to examine if mothers with elevated maternal GCs exhibited an altered  
275 relationship between growth and the response variable (66-67). Due to smaller sample sizes for  
276 these variables, we did not include an interaction between sex and treatment. In the model to  
277 assess treatment effects on telomere lengths, we also included a fixed effect for the oxidative  
278 stress levels in the liver (Liver PC1). We included a random intercept term for litter ID for all of  
279 these models except if the model indicated that the variance in the random effect was exactly 0.

280 All analyses were conducted in R (version 3.5.2, 78) using lme4 (version 1.1-18-1, 79)  
281 and *P*-values were estimated using *lmerTest* (version 3.0-1, 80). Continuous predictor variables  
282 were standardized (mean of 0, SD of 1) with birth date, litter size, and growth being standardized  
283 within each grid-year combination. Assumptions of homoscedasticity, normality of residuals for  
284 our LMMs, and a lack of high leverage observations were confirmed using diagnostic plots (81).  
285 We estimated variance inflation factors (VIFs) from our models to assess multicollinearity  
286 among the predictor variables (81) and VIFs indicated that multicollinearity was not an issue in  
287 these models (all VIF < 3.31 except if included in an interaction or a multi-level categorical  
288 variable).

289

## 290 **Results**

291 *Effects of treating pregnant females with GCs on offspring*

292 Offspring from mothers treated with GCs during pregnancy grew 17% faster ( $t_{41.6} = 3.04$ ,  
293  $P = 0.004$ , Table S2A, Fig. 1A) but were not larger in structural size (Table S2B, Fig. 1C), and  
294 did not differ in body condition (as reflected in their haematocrit levels: Table S3A) than those  
295 produced by control mothers. There was no indication that the treatments had sex-specific effects  
296 on offspring growth or size (Table S2). There was also no indication of a trade-off between litter  
297 size and offspring growth or size during the years that we studied (Table S2) nor was there any  
298 evidence that treating mothers with GCs during pregnancy altered the relationship between litter  
299 size and growth rate, as indicated by the lack of significant interactions between treatment and  
300 litter size for offspring growth and size (Table S2). Because the treatments had no significant  
301 effects on litter size or litter sex ratio (ESM), the effects of the treatments on offspring growth  
302 were not simply due to a reduction in litter size.

303 Despite growing faster, offspring from mothers treated with GCs during pregnancy did  
304 not have higher oxidative stress levels in the blood, liver, or heart (Table S4, Fig. 2) and they  
305 also did not have shorter telomere lengths (Table S5, Fig. 3). Offspring from mothers treated  
306 with GCs during pregnancy that grew faster did not have higher oxidative stress levels in blood,  
307 heart, or liver nor did they have shorter telomere lengths (Tables S4-S5). There was no indication  
308 that growth or its interaction with maternal treatment impacted oxidative stress levels (Table S4)  
309 or liver telomere lengths (Table S5) in offspring from females treated during pregnancy.

#### 310 *Effects of treating lactating females with GCs on offspring*

311 Offspring from mothers treated with GCs during lactation grew 34.8% slower ( $t_{26.4} = -$   
312  $2.14$ ,  $P = 0.04$ , Table S6A, Fig. 1B), but were not significantly smaller in structural size (Table  
313 S6B, Fig. 1D), and did not differ in body condition (as reflected in haematocrit levels: Table  
314 S3B) from those of pups from control mothers. There was no indication that the treatments had

315 sex-specific effects on offspring growth or size, as reflected in the lack of significant sex x  
316 treatment interactions (Table S6). There was also no indication of a trade-off between litter size  
317 and offspring growth or size (Table S6) and no evidence that treating females with GCs during  
318 lactation altered the relationship between litter size and growth rate, as indicated by the lack of  
319 significant interactions between treatment and litter size for offspring growth and size (Table  
320 S6). Because the treatments had no significant effects on litter size or litter sex ratio (ESM), the  
321 effects of the treatments on offspring growth were not simply due to a reduction in litter size.

322       Offspring from mothers treated with GCs during lactation did not have higher oxidative  
323 stress levels than those from control mothers in any of the three tissues (blood, heart, liver: Table  
324 S7, Fig. 2B, 2D, 2F) and they also did not have shorter telomere lengths (Table S5, Fig. 3B).

325 Offspring from mothers treated during lactation that grew faster did not have higher oxidative  
326 stress levels in blood, heart, or liver nor did they have shorter telomere lengths (Table S7). There  
327 was also no indication that growth or its interaction with maternal treatment impacted oxidative  
328 stress levels (Table S7) or liver telomere lengths (Table S5) in offspring from females treated  
329 during lactation.

330

## 331 **Discussion**

332       Mothers treated with GCs during pregnancy produced faster growing offspring whereas  
333 mothers treated with GCs during lactation produced slower growing offspring. There were no  
334 treatment effects on offspring structural size, indicating that while offspring from mothers treated  
335 with GCs gained mass at a different rate than the controls, the treatments did not influence  
336 skeletal size. However, we only obtained one measure of structural size when offspring were ~25  
337 d of age and therefore did not quantify any treatment effects in the rate of change in structural

338 size as we did for body mass. Our results differ from a recent literature analysis across mammals  
339 showing that offspring from mothers experiencing late gestational stress grew more slowly  
340 before weaning (21). One explanation is that elevated GCs simply modulated the trade-off  
341 between offspring quantity and quality (e.g., producing small litters of fast-growing offspring) or  
342 ameliorated the trade-off between offspring quantity and quality (e.g., lessening the effect of  
343 increased litter size on the growth rate of each individual offspring: 82). This is unlikely because  
344 we found no treatment effects on litter size (results in ESM) nor on the trade-off between litter  
345 size and growth rate. Thus, somehow females treated with GCs during pregnancy produced fast  
346 growing offspring without merely reducing their litter sizes, though it is notable that in the years  
347 in which we conducted this study, we also did not document a trade-off between litter size and  
348 offspring growth in any of the treated or control females.

349         We did not find support for the hypothesis that elevated maternal GCs during pregnancy  
350 or lactation or increased offspring growth elevated oxidative stress levels or shortened telomere  
351 lengths in offspring, as other studies have predicted (20, 28, 57). This is surprising and requires  
352 explanation. First, we measured oxidative stress levels in offspring when they were weaned (~70  
353 d of age) whereas we treated their mothers with GCs either during pregnancy or early lactation.  
354 Thus, it is possible that the offspring in our study experienced elevated oxidative stress levels but  
355 these effects had disappeared by weaning. A second possibility is an artefact associated with  
356 selective disappearance of poor-quality individuals from those mothers treated with GCs during  
357 pregnancy, such as slow growing individuals with short telomeres dying before we could obtain  
358 our measures of oxidative stress and telomere lengths. This is unlikely as we observed no  
359 treatment effects on litter size or the reduction in litter size from the first to second nest entry  
360 (results shown in ESM). Finally, the fact that mothers treated with GCs did not produce offspring



361 with elevated oxidative stress levels or shorter telomeres may have been because of the effects of  
362 maternally-derived GCs on offspring telomerase levels, an enzyme that is capable of rebuilding  
363 telomeres or buffering them from attrition (83). We did not measure telomerase levels, but a  
364 previous study showed that long-term exposure of laboratory rats to unpredictable stressors  
365 increased the production of telomerase (84). We think that the most plausible explanation is that  
366 treating mothers with GCs may have promoted increases in telomerase or enzymatic antioxidant  
367 production that had protective effects on offspring. This would be consistent with predictions  
368 from the oxidative shielding hypothesis (32) that proposes that females may reduce their own  
369 levels of oxidative damage (perhaps by upregulation of enzymatic antioxidants) to mitigate their  
370 detrimental influence on offspring.

371         Our results indicate that elevated GCs can impact maternal investment in the current  
372 litter. Females experiencing elevated GCs during pregnancy increased their investment in the  
373 current litter whereas females experiencing elevated GCs during lactation reduced their  
374 investment in the current. Life history theory predicts that such changes in maternal investment  
375 in offspring could alter the survival or future reproduction of mothers (82) or increase their  
376 oxidative stress levels (32, 85). However, our previous work in red squirrels shows that their  
377 food caching nature results in unexpected patterns with respect to the potential costs of  
378 reproductive investment. Red squirrels can elevate reproductive output (i.e., producing a second  
379 litter or larger litters) in anticipation of increased future food abundance (69) or produce faster  
380 growing offspring when the fitness payoffs warrant increased investment in the current litter (4).  
381 They seem to be able to do this without additional access to food except the food that they  
382 already have stored from the previous autumn (4, 69, 86). Thus far, costs for this increased  
383 reproductive investment in the current litter exhibited by female red squirrels seem to be small or

384 absent. Female red squirrels with increased reproductive effort do expend more energy (31, 86)  
385 and experience increased oxidative protein damage (31) but we have not yet documented  
386 substantive survival costs for females that increase their reproductive output (86, 87). We have  
387 not yet quantified any costs to mothers who were treated with GCs during pregnancy and who on  
388 average produced faster growing offspring. Unless females upregulate the production of  
389 protective enzymatic antioxidants or telomerase (32), it seems likely that females with elevated  
390 GCs would experience increased oxidative damage due to their elevated reproductive investment  
391 or because of the elevated levels of GCs that they experience. For example, previous studies in  
392 red squirrels (31) and other species (32) highlight that increased reproductive investment or  
393 increased exposure to GCs (34-37) may elevate oxidative damage in breeding females with  
394 elevated GCs during reproduction.

395         Although it is not known whether increased antioxidants, reduced oxidative damage, or  
396 elongated telomeres actually cause an increase in longevity (46), our results suggest that fast  
397 growing offspring or those from mothers treated with GCs during pregnancy or lactation would  
398 not experience a reduction in lifespan. Our results and our previous study in red squirrels (4)  
399 show that maternal GCs during pregnancy or lactation can induce plasticity in offspring growth  
400 and that this plasticity should be adaptive for high density environments (4). However, we did  
401 not find support for the hypothesis that elevated maternal GCs induce a faster pace of life where  
402 offspring grow faster and are more competitive early in life but this comes at some oxidative cost  
403 that may predict a shortened lifespan. Future studies should assess oxidative stress using an even  
404 broader array of measures than the few measures we used here and will of course need to assess  
405 if elevated maternal GCs actually impact offspring lifespan.

406

407 **Funding:** Research was supported by the National Science Foundation to B.D. (1749627) and to  
408 B.D. and A.G.M. (1110436) as well as funds from the University of Michigan to B.D. The  
409 Kluane Red Squirrel Project is supported by the Natural Sciences and Engineering Research  
410 Council of Canada to S.B., A.G.M., and J.E.L.

411

412 **Acknowledgements:** We thank the Champagne and Aishihik First Nations and Agnes  
413 MacDonald for allowing us to study squirrels on their traditional territory. Special thanks to the  
414 field technicians that helped collect these data, especially to Monica Cooper, Stacie Evans, Zach  
415 Fogel, Claire Hoffmann, Noah Israel, Sean Konkolics, Laura Porter, Matt Sehrsweeney, Sam  
416 Sonnega, and Jess Steketee. This is publication xx of the Kluane Red Squirrel Project.

417

#### 418 **References**

419 1) Mousseau TA, Fox CW. 1998. Maternal Effects as Adaptations. Oxford Univ. Press, Oxford,  
420 UK

421 2) Agrawal AG, Laforsch C, Tollrian R. 1999. Transgenerational induction of defences in  
422 animals and plants. *Nature* 401:60-63.

423 3) Galloway LF, Etterson JR. 2007. Transgenerational plasticity is adaptive in the wild. *Science*  
424 318:1134-1136.

425 4) Dantzer B, Newman AE, Boonstra R, Palme R, Boutin S, Humphries MM, McAdam AG.  
426 2013. Density triggers maternal hormones that increase adaptive offspring growth in a  
427 wild mammal. *Science* 340:1215-1217.

428 5) Love OP, Williams TD. 2008. The adaptive value of stress-induced phenotypes: effects of

- 429 maternally derived corticosterone on sex-biased investment, cost of reproduction, and  
430 maternal fitness. *Am Nat* 172:E135-E149.
- 431 6) Sheriff MJ, Bell A, Boonstra R, Dantzer B, Lavergne SG, McGhee KE, MacLeod KJ,  
432 Winandy L, Zimmer C, Love OP. 2017. Integrating ecological and evolutionary context  
433 in the study of maternal stress. *Integrative and Comparative Biology* 57, 437-449.
- 434 8) Sapolsky RM, Romero LM, Munck AU. 2000. How do glucocorticoids influence stress  
435 responses? Integrating permissive, suppressive, stimulatory, and preparative actions.  
436 *Endocrine Reviews* 21:55-89.
- 437 9) Harris A, Seckl J. 2011. Glucocorticoids, prenatal stress and the programming of disease.  
438 *Horm Behav* 59:279-289.
- 439 10) Barbazanges A, Piazza PV, Le Moal M, Maccari S. 1996. Maternal glucocorticoid secretion  
440 mediates long-term effects of prenatal stress. *J Neurosci* 16:3943-3949.
- 441 11) Weinstock M. 2005. The potential influence of maternal stress hormones on development  
442 and mental health of the offspring. *Brain Behav Immun* 19:296-308.
- 443 12) Lupien SJ, McEwen BS, Gunnar MR, Heim C. 2009. Effects of stress throughout the  
444 lifespan on the brain, behavior and cognition. *Nat Rev Neurosci* 10:434-445.
- 445 13) Zarrow MX, Philpott JE, Denenberg VH. 1970. Passage of <sup>14</sup>C-4 corticosterone from the rat  
446 mother to the foetus and neonate. *Nature* 226:1058-1059
- 447 14) Casolini P, Cigliana G, Alemá GS, Ruggieri V, Angelucci L, Catalani, A. 1997. Effect of  
448 increased maternal corticosterone during lactation on hippocampal corticosteroid  
449 receptors, stress response and learning in offspring in the early stages of life.  
450 *Neuroscience* 79:1005-1012.
- 451 15) Herrenkohl LR, Whitney JB. 1976. Effects of prepartal stress on postpartal nursing behavior,

- 452 litter development and adult sexual behavior. *Physiol Behav* 17:1019-1021.
- 453 16) Brummelte S, Galea LAM. 2010. Chronic corticosterone during pregnancy and postpartum  
454 affects maternal care, cell proliferation and depressive-like behavior in the dam. *Horm*  
455 *Behav* 58:769-779.
- 456 17) Nephew BC, Bridges RS. 2011. Effects of chronic social stress during lactation on maternal  
457 behavior and growth in rats. *Stress* 14, 677-684.
- 458 18) Nettle D, Frankenhuys WE, Rickard IJ. 2013. The evolution of predictive adaptive responses  
459 in human life history. *Proceedings of the Royal Society B* 280, 20131343.
- 460 19) Weaver ICG, Cervoni N, Champagne FA, D'Alessio AC, Sharma S, Seckl JR, Dymov S,  
461 Szyf M, Meaney MJ. 2004. Epigenetic programming by maternal behavior. *Nat Neurosci*  
462 7:847-854.
- 463 20) Monaghan P, Haussmann MF. 2015. The positive and negative consequences of stressors  
464 during early life. *Early Human Development* 91, 643-647.
- 465 21) Berghänel, A, Heistermann, M, Schülke, O, Ostner J. 2017. Prenatal stress accelerates  
466 offspring growth to compensate for reduced maternal investment across mammals. *PNAS*  
467 114, E10658-E10666.
- 468 22) Berghänel, A, Heistermann, M, Schülke, O, Ostner J. 2016. Prenatal stress effects in a wild,  
469 long-lived primate: predictive adaptive responses in an unpredictable environment.  
470 *Proceedings of the Royal Society B* 283, 20161304.
- 471 23) Reznick DA, Bryga H, Endler JA. 1990. Experimentally induced life-history evolution in a  
472 natural population. *Nature* 346, 357-359.
- 473 24) Stearns SC, Ackermann M, Doebeli M, Kaiser M. 2000. Experimental evolution of aging,  
474 growth, and reproduction in fruitflies. *PNAS* 97, 3309-3313.

- 475 25) Metcalfe NB, Monaghan P. 2001. Compensation for a bad start: grow now, pay later? Trends  
476 Ecol Evol 16:254-260.
- 477 26) Lee W-S, Monaghan P, Metcalfe NB. 2013. Experimental demonstration of the growth rate-  
478 lifespan trade-off. Proceedings of the Royal Society B 280, 20122370.
- 479 27) Lemaître J-F, Berger V, Bonenfant C, Douhard M, Gamelon M, Plard F, Gaillard J-M. 2015.  
480 Early-late life trade-offs and the evolution of ageing in the wild. Proceedings of the Royal  
481 Society B 282, 20150209.
- 482 28) Monaghan P, Ozanne SE. 2018. Somatic growth and telomere dynamics in vertebrates:  
483 relationships, mechanisms and consequences. Philosophical Transactions of the Royal  
484 Society of London B 373, 20160446.
- 485 29) Beckman KB, Ames BN. 1998. The free radical theory of aging matures. *Physiol Rev*  
486 78:547-581.
- 487 30) Halliwell B, Gutteridge J. 2015. *Free Radicals in Biology and Medicine*. Oxford University  
488 Press.
- 489 31) Fletcher QE, Selman C, Boutin S, McAdam AG, Woods SB, Seo AY, Leeuwenburgh C,  
490 Speakman JR, Humphries MM. 2012. Oxidative damage increases with reproductive  
491 energy expenditure and is reduced by food-supplementation. *Evolution* 67:1527-1536.
- 492 32) Blount JD, Vitikainen EIK, Stott I, Cant MA. 2016. Oxidative shielding and the cost of  
493 reproduction. *Biological Reviews* 91, 483-497.
- 494 33) Smith SM, Nager RG, Costantini D. 2016. Meta-analysis indicates that oxidative stress is  
495 both a constraint on and a cost of growth. *Ecology and Evolution* 6, 2833-2842.
- 496 34) Kotrschal A, Illmonen P, Penn DJ. 2007. Stress impacts telomere dynamics. *Biology Letters*  
497 3, 128-130.

- 498 35) You JM, Yun SJ, Nam KN, Kang C, Won R, Lee EH. 2009. Mechanism of glucocorticoid-  
499 induced oxidative stress in rat hippocampal slice cultures. *Canadian Journal of*  
500 *Physiology and Pharmacology* 87, 440-447.
- 501 36) Costantini D, Marasco V, Møller AP. 2011. A meta-analysis of glucocorticoids as  
502 modulators of oxidative stress in vertebrates. *Journal of Comparative Physiology B* 181,  
503 447-456.
- 504 37) Herborn KA, Heidinger BJ, Boner W, Noguera JC, Adam A, Daunt F, Monaghan P. 2014.  
505 Stress exposure in early post-natal life reduces telomere length: an experimental  
506 demonstration in a long-lived seabird. *Proceedings of the Royal Society B* 281,  
507 20133151.
- 508 38) Selman C, Blount JD, Nussey DH, Speakman JR. 2012. Oxidative damage, ageing, and life-  
509 history evolution: where now? *Trends Ecol Evol* 27:570-577.
- 510 39) Harley CB, Futcher AB, Greider CW. 1990. Telomeres shorten during ageing of human  
511 fibroblasts. *Nature* 31, 458-460.
- 512 40) Aubert G, Lansdorp PM. 2008. Telomeres and aging. *Physiol Rev* 88, 557-579.
- 513 41) von Zglinicki T. 2002. Oxidative stress shortens telomeres. *Trends Biochem Sci* 27, 339-344.
- 514 42) Houben JM, Moonen HJ, van Schooten FJ, Hageman GJ. 2008. Telomere length assessment:  
515 biomarker of chronic oxidative stress? *Free Radic Biol Med* 44, 235-246.
- 516 43) Reichert S, Stier A. 2017. Does oxidative stress shorten telomeres *in vivo*? A review.  
517 *Biology Letters* 13, 20170463.
- 518 44) Bodnar AG, Ouellette M, Frolkis M, Holt SE, Chiu CP, Morin GB, Harley CB, Shay JW,  
519 Lichtsteiner S, Wright WE. 1998. Extension of life-span by introduction of telomerase  
520 into normal human cells. *Science* 279, 349-352.

- 521 45) Rudolph KL, Chang S, Lee HW, Blasco M, Gottlieb GJ, Greider C, DePinho RA. 1999.  
522 Longevity, stress response, and cancer in aging telomerase-deficient mice. *Cell* 96, 701-  
523 712.
- 524 46) Simons MJP. 2015. Questioning causal involvement of telomeres in aging. *Ageing Res Rev*  
525 24, 191-196.
- 526 47) Cawthon RM, Smith KR, O'Brien E, Sivatchenko A, Kerber RA. 2003. Association between  
527 telomere length in blood and mortality in people aged 60 years or older. *Lancet* 36, 393-  
528 395.
- 529 48) Hausmann MF, Winkler DW, Vleck CM. 2005. Longer telomeres associated with higher  
530 survival in birds. *Biology Letters* 1, 212-214.
- 531 49) Bize P, Criscuolo F, Metcalfe NB, Nasir L, Monaghan P. 2009. Telomere dynamics rather  
532 than age predict life expectancy in the wild. *Proceedings of the Royal Society B* 276,  
533 1679-1683.
- 534 50) Salomons HM, Mulder GA, van de Zande L, Hausmann MF, Linskens MHK, Verhulst S.  
535 2009. Telomere shortening and survival in free-living corvids. *Proceedings of the Royal*  
536 *Society B* 276, 3157-3165.
- 537 51) Boonekamp JJ, Mulder GA, Salomons HM, Dijkstra C, Verhulst S. 2014. Nestling telomere  
538 shortening, but not telomere length, reflects telomere developmental stress and predicts  
539 survival in wild birds. *Proceedings of the Royal Society B* 281, 20133287.
- 540 52) Hausmann MF, Winkler DW, O'Reilly KM, Huntington CE, Nisbet ICT, Vleck CM. 2003.  
541 Telomeres shorten more slowly in long-lived birds and mammals than in short-lived  
542 ones. *Proceedings of the Royal Society of London B* 270, 1387-1392.
- 543 53) Dantzer B, Fletcher QE. 2015. Telomeres shorten more slowly in slow-aging wild animals



- 544 than in fast-aging ones. *Experimental Gerontology* 71, 38-47.
- 545 54) Sudyka J, Arct A, Drobniak S, Gustafsson L, Cichon M. 2016. Longitudinal studies confirm  
546 faster telomere erosion in short-lived bird species. *Journal of Ornithology* 157, 373-375.
- 547 55) Tricola GM, Simons MJP, Atema E, Boughton RK, Brown JL, Dearborn DC, Eimes JA,  
548 Huntington CE, Kitaysky AS, Juola FA, Lank DB, Litwa HP, Mulder EGA, Nisbet ICT,  
549 Okanoya K, Safran R, Schoech SJ, Schreiber EZ, Thompson PM, Verhulst S,  
550 Wheelwright NT, Winkler DW, Young R, Vleck CM, Haussmann MF. 2018. The rate of  
551 telomere loss is related to maximum lifespan in birds. *Philosophical Transactions of the*  
552 *Royal Society B* 373, 20160445.
- 553 56) Shalev I. 2012. Early life stress and telomere length: investigating the connection and  
554 possible mechanisms: a critical survey of the evidence base, research methodology and  
555 basic biology. *BioEssays* 34, 943-952.
- 556 57) Haussmann MF, Heidinger BJ. 2015. Telomere dynamics may link stress exposure and  
557 ageing across generations. *Biology Letters* 11, 20150396.
- 558 58) Shalev I, Belsky J. 2016. Early-life stress and reproductive cost: a two-hit developmental  
559 model of accelerated aging? *Medical Hypotheses* 90, 41-47.
- 560 59) Entringer S, Epel ES, Kumsta R, Lin J, Hellhammer DH, Blackburn EH, Wüst S, Wadhwa  
561 PD. 2011. Stress exposure in intrauterine life is associated with shorter telomere length in  
562 young adulthood. *PNAS* 108, E513-E518.
- 563 60) Haussmann MF, Longenecker AS, Marchetto NM, Juliano SA, Bowden RM. 2012.  
564 Embryonic exposure to corticosterone modifies the juvenile stress response, oxidative  
565 stress and telomere length. *Proc Roy Soc B* 279:1447-1456.
- 566 61) Marchetto NM, Glynn RA, Ferry ML, Ostojic M, Wolff SM, Yao R, Haussmann MF. 2016.

- 567 Prenatal stress and newborn telomere length. *Am J Obstet Gynecol* 215, 94.e1-8.
- 568 62) van Kesteren F, Delehanty B, Westrick SE, Palme R, Boonstra R, Lane JE, Boutin S,  
569 McAdam AG, Dantzer B. 2018. Experimental increases in glucocorticoids alter function  
570 of the HPA axis in wild red squirrels without negatively impacting survival and  
571 reproduction. *Physiological and Biochemical Zoology in press*.
- 572 63) Garratt M, McArdle F, Stockley P, Vasilaki A, Beynon RJ, Jackson MJ, Hurst JL. 2012.  
573 Tissue-dependent changes in oxidative damage with male reproductive effort in house  
574 mice. *Functional Ecology* 26, 423-433.
- 575 64) Friedrich U, Griese EU, Schwab M, Fritz P, Thon KP, Klotz U. 2000. Telomere length in  
576 different tissues of elderly patients. *Mechanisms of Ageing and Development* 119, 90-99.
- 577 65) Westrick SE, Taylor RW, Boutin S, Lane JE, McAdam AG, Dantzer B. Fitness benefits of a  
578 motivated mom. *BioRxiv [Preprint]* March 31 2019 [cited May 31 2019].  
579 doi:10.1101/594093
- 580 66) Careau V, Buttemer WA, Buchanan KL. 2014. Developmental stress can uncouple  
581 relationships between physiology and behaviour. *Biology Letters* 10, 20140834.
- 582 67) Merrill L, Grindstaff JL. 2018. Early life stress strengthens trait covariance: a plastic response  
583 that results in reduced flexibility. *The American Naturalist* 192, 593-604.
- 584 68) McAdam AG, Boutin S, Sykes AK, Humphries MM. 2007. Life histories of female red  
585 squirrels and their contributions to population growth and lifetime fitness *Ecoscience* 14,  
586 362-369.
- 587 69) Boutin S, Wauters LA, McAdam AG, Humphries MM, Tosi G, Dhondt AA. 2006.  
588 Anticipatory reproduction and population growth in seed predators. *Science* 314, 1928-  
589 1930.

- 590 70) McAdam AG, Boutin S, Réale D, Berteaux D. 2002. Maternal effects and the potential for  
591 evolution in a natural population of animals *Evolution* 56, 846-851.
- 592 71) Larsen KW, Boutin S. 1994. Movements, survival, and settlement of red squirrel  
593 (*Tamiasciurus hudsonicus*) offspring. *Ecology* 75, 214-223.
- 594 72) Breuner CW, Delehanty B, Boonstra R. 2013. Evaluating stress in natural populations of  
595 vertebrates: total CORT is not good enough. *Functional Ecology* 27, 24-36.
- 596 73) Monaghan P, Metcalfe NB, Torres, R. 2009. Oxidative stress as a mediator of life history  
597 trade-offs: mechanisms, measurements and interpretation. *Ecol Lett* 12:75-92.
- 598 74) Hausmann MF, Mauck RA. 2008. New strategies for telomere-based age estimation.  
599 *Molecular Ecology Resources* 8, 264-274.
- 600 75) Dantzer B, Dubuc C, Goncalves IB, Cram DL, Bennett NC, Ganswindt A, Heistermann M,  
601 Duncan C, Gaynor D, Clutton-Brock TH. 2019. The development of individual  
602 differences in cooperative behaviour: maternal glucocorticoid hormones later helping  
603 behaviour of offspring in wild meerkats. *Philosophical Transactions of the Royal Society*  
604 *B* 374, 20180117.
- 605 76) Dray S, Dufour A-B. 2007. The ade4 package: implementing the duality diagram for  
606 ecologists. *Journal of Statistical Software* 22(4). <http://doi.org/10.18637/jss.v022.i04>
- 607 77) Costantini D, Verhulst S. 2009. Does high antioxidant capacity indicate low oxidative stress?  
608 *Functional Ecology* 23, 506-509.
- 609 78) R Development Core Team. 2013. R: a language and environment for statistical computing.  
610 Vienna, Austria: R Foundation for Statistical Computing.
- 611 79) Bates, D., Mächler, M., Bolker, B., & Walker, S. (2015). Fitting linear mixed-effects models  
612 using lme4. *Journal of Statistical Software*, 67(1). <http://doi.org/10.18637/jss.v067.i01>

- 613 80) Kuznetsova, A., Brockhoff, P., & Christensen, R. (2017). lmerTest: Tests in linear mixed  
614 effects models. *Journal of Statistical Software*, 82, 1–26. doi: 10.18637/jss.v082.i13
- 615 81) Zuur AF, Ieno EN, Elphick CS. 2010. A protocol for data exploration to avoid common  
616 statistical problems. *Methods in Ecology and Evolution* 1, 3-14.
- 617 82) Stearns SC. 1992. *The Evolution of Life Histories*. Oxford University Press, London.
- 618 83) Blackburn, EH. 2005. Telomeres and telomerase: their mechanisms of action and the effects  
619 of altering their functions. *FEBS Letters* 7, 859-862.
- 620 84) Beery AK, Lin J, Biddle JS, Francis DD, Blackburn EH, Epel ES. 2012. Chronic stress  
621 elevates telomerase activity in rats. *Biology Letters* 8, 1063-1066.
- 622 86) Monaghan P, Haussmann MF. 2006. Do telomere dynamics link lifestyle and lifespan?  
623 *Trends in Ecology and Evolution* 21, 47-53.
- 624 87) Humphries MM, Boutin S. 2000. The determinants of optimal litter size in free-ranging red  
625 squirrels. *Ecology* 81, 2867-2877.
- 626 88) Descamps S, Boutin S, McAdam AG, Bearteux D, Gaillard J-M. 2009. Survival costs of  
627 reproduction vary with age in North American red squirrels. *Proceedings of the Royal*  
628 *Society B* 276, 1129-1135.
- 629

630 **Figure 1. Effects of treating pregnant or lactating female red squirrels with glucocorticoids**  
631 **(GCs) on offspring postnatal growth and structural size. A)** Offspring from females treated  
632 with GCs during pregnancy grew significantly faster than those from controls. **B)** Offspring from  
633 females treated with GCs during lactation grew significantly slower than those from controls. **C**  
634 **& D)** There were no treatment effects on the structural size of offspring. Offspring size is a  
635 composite variable where high scores of PC1 correspond to offspring with larger zygomatic arch  
636 widths and longer hind foot lengths. Results in Tables S2 & S6. Upper and lower hinges  
637 correspond to the first and third quartiles while white diamonds indicate means and horizontal  
638 line indicate medians.

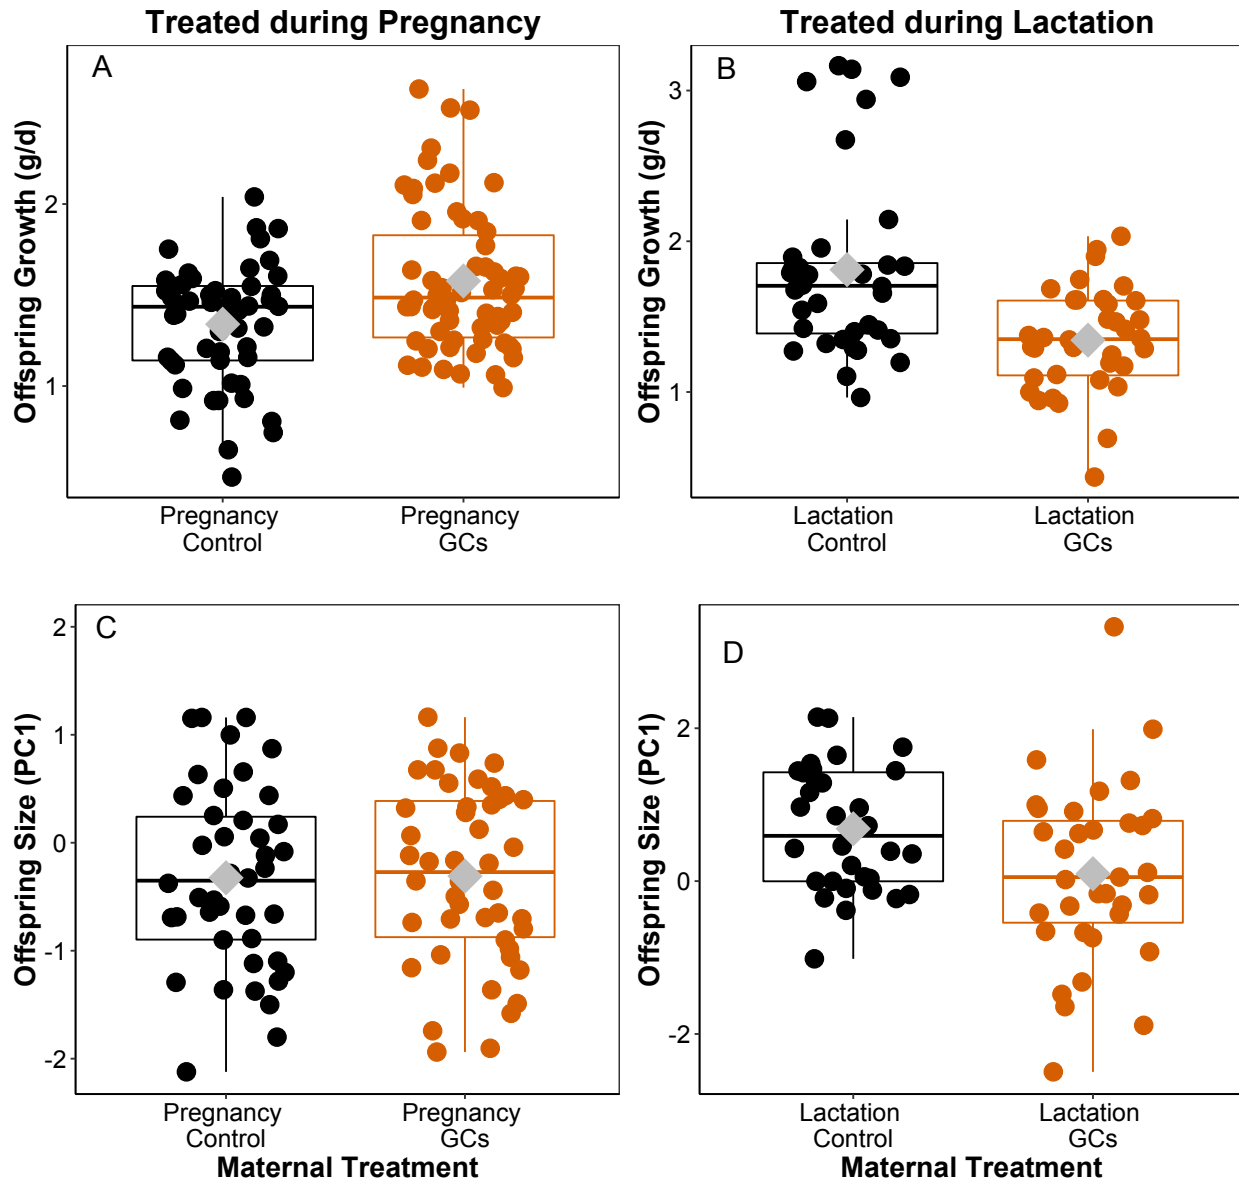

639

640

641 **Figure 2. Effects of treating pregnant or lactating female red squirrels with glucocorticoids**  
642 **(GCs) on oxidative stress levels in blood, liver, and heart tissue from weaned juvenile red**  
643 **squirrels.** There were no significant treatment effects on oxidative stress levels in the blood (A,  
644 B), heart (C, D), or liver (E, F) for offspring produced by mothers treated with GCs during  
645 pregnancy or lactation. Values on y-axes reflect a composite variable generated by separate  
646 principal component analyses for blood, heart, and liver tissue where high scores correspond to  
647 low levels of one or two of the antioxidants (TAC, SOD) and, for heart, higher levels of protein  
648 damage (PCC; see Table S1). Results in Tables S4 & S7. Note differences between y-axes  
649 among the panels.

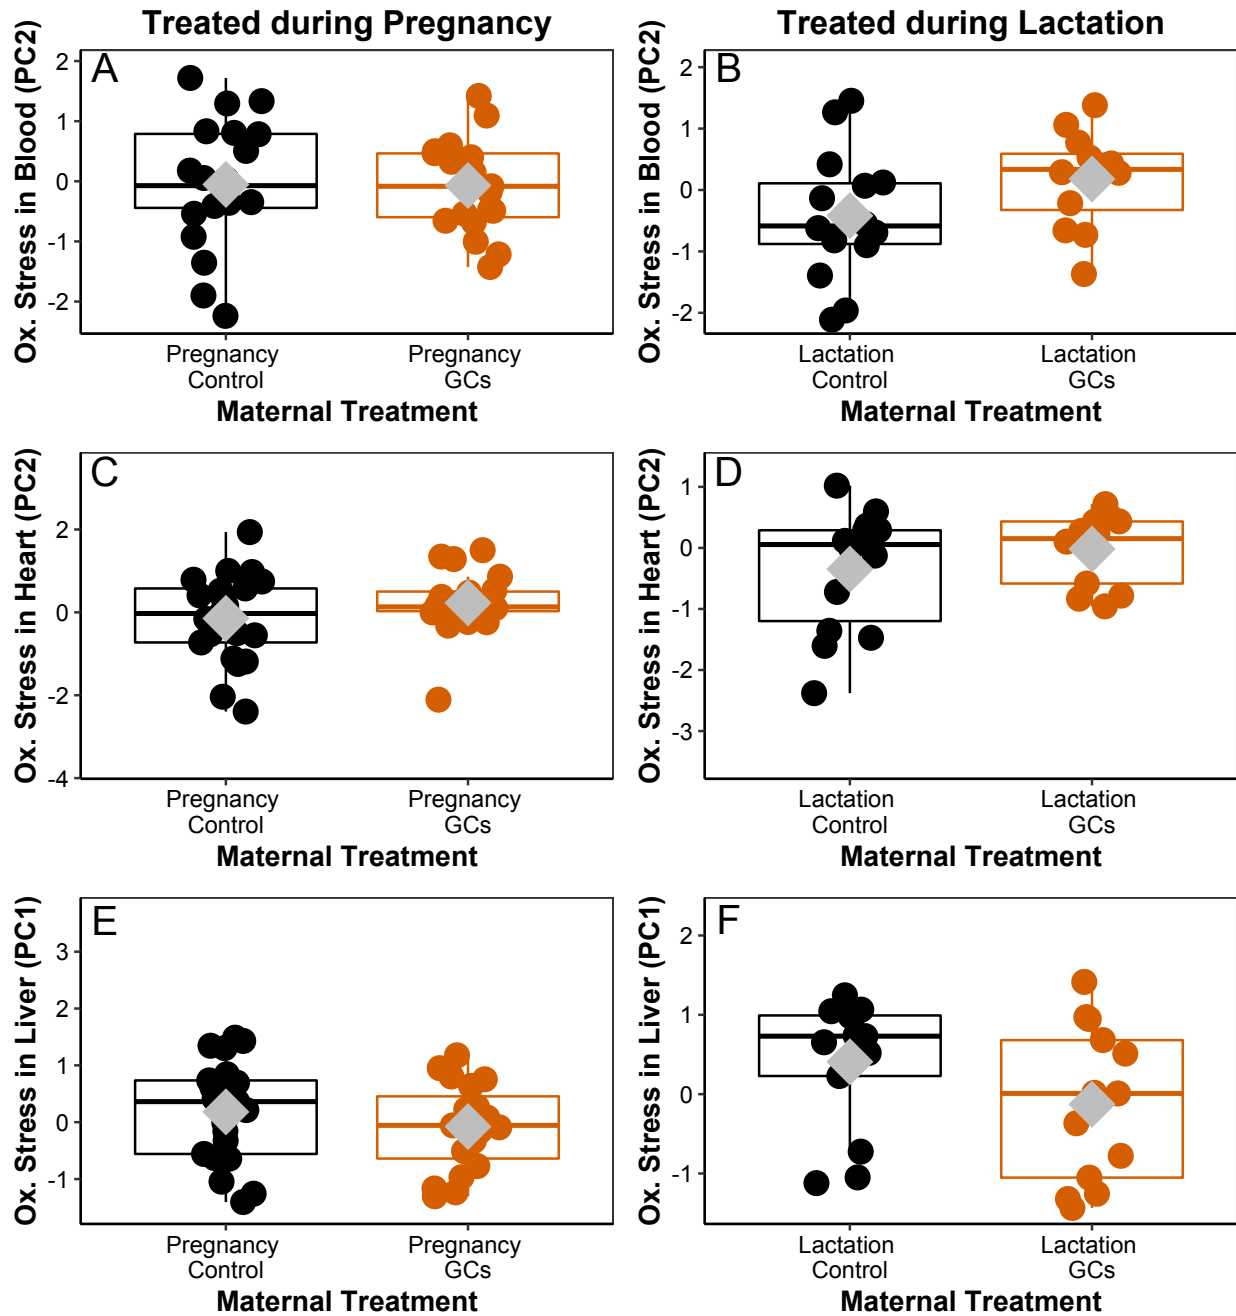

650

651 **Figure 3. Effects of treating pregnant or lactating female red squirrels with glucocorticoids**  
652 **(GCs) on mean liver telomere lengths in weaned offspring. A & B) There were no significant**  
653 **treatment effects on liver telomere lengths. Results shown in Table S5.**  
654

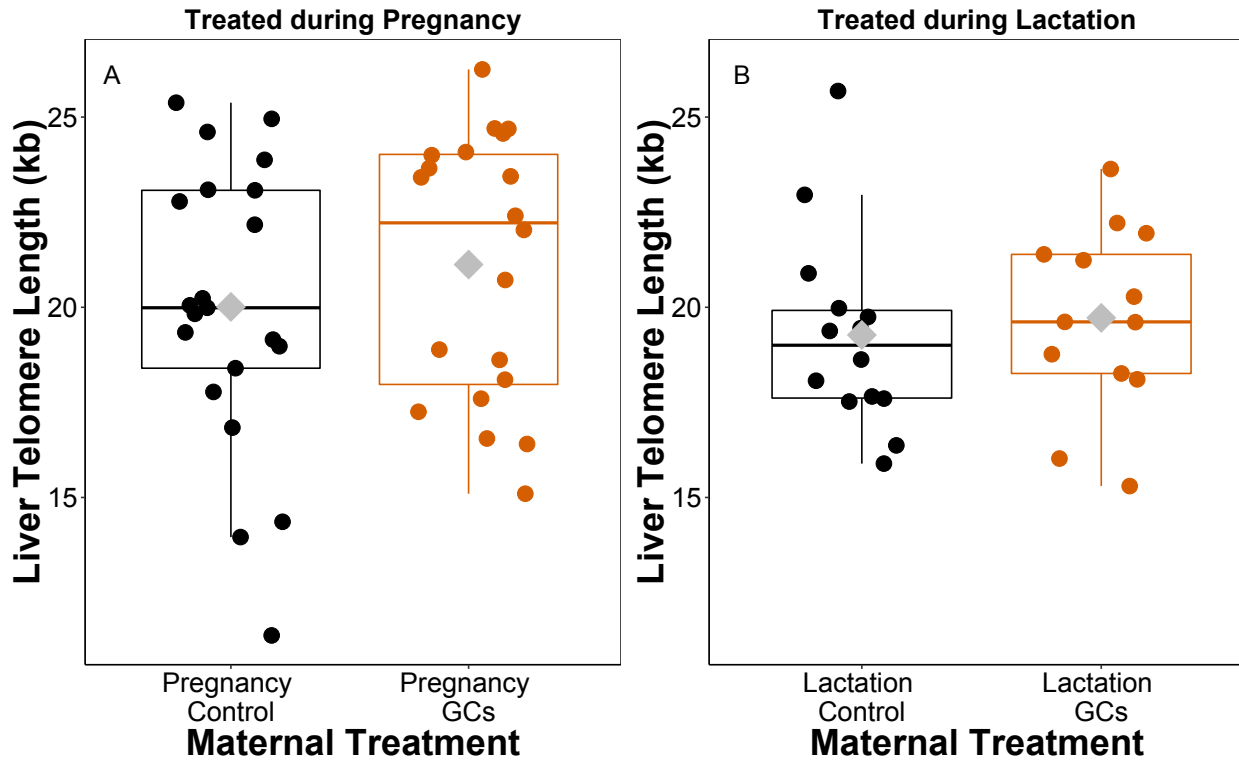

655  
656

657

*Electronic Supplementary Material*

658

659 **Maternal stress promotes offspring growth without oxidative costs in wild red squirrels**

660

661 Ben Dantzer<sup>1,2</sup>, Freya van Kesteren<sup>1</sup>, Sarah E. Westrick<sup>1</sup>, Stan Boutin<sup>3</sup>, Andrew G. McAdam<sup>4</sup>,

662 Jeffrey E. Lane<sup>5</sup>, Robert Gillespie<sup>6</sup>, Ariana Majer<sup>7</sup>, Mark Hausmann<sup>7</sup>, Pat Monaghan<sup>6</sup>

663



## 664 **Supplementary Materials and Methods**

### 665 *Maternal treatments*

666 Dosage of hydrocortisone varied among some of the treatment groups but we have  
667 previously shown that either 3, 6, 8, or 12 mg of hydrocortisone per day significantly elevates  
668 plasma cortisol and faecal glucocorticoid metabolite levels within a biologically-relevant range  
669 (Dantzer et al., 2013; van Kesteren et al., 2019). Females in the Pregnancy GCs treatment group  
670 were provisioned either with 3 mg (4 litters), 6 mg (n = 6 litters), 8 mg (n = 25 litters), or 12 mg  
671 (7 litters) of hydrocortisone whereas females in the Lactation GCs treatment groups were  
672 provisioned either with 8 mg per day (10 litters) or 12 mg per day (8 litters). Although the  
673 dosage administered to females varied, we grouped those administered GCs in the same  
674 treatment group (e.g., Pregnancy GCs contained females administered 3-12 mg of  
675 hydrocortisone) as in a previous one-year study (Dantzer et al., 2013) we found that the effects  
676 GC dosages of 3, 6, and 12 mg per day on growth were in the same direction.

677 We aimed to treat females in the pregnancy treatments from approximately 20 d after  
678 conception until 5 d after birth (or 20-40 d post-conception as red squirrels on average have a  
679 ~35 d gestation period), whereas we actually treated females in the pregnancy GCs treatment  
680 group from  $24.1 \pm 0.9$  d (mean  $\pm$  SE) to  $38.9 \pm 0.6$  d post-conception (mean  $\pm$  SE treatment  
681 duration:  $14.9 \pm 0.8$  d) and females in the pregnancy control treatment group from  $20.1 \pm 0.9$  d  
682 to  $38.2 \pm 0.6$  d (treatment duration:  $18.1 \pm 0.8$  d). We aimed to treat females in the lactation  
683 treatments from approximately 5 d after parturition until 15 d post-parturition, whereas we  
684 actually treated females in the lactation GCs treatment group from  $5.4 \pm 0.5$  d (mean  $\pm$  SE) to  
685  $14.5 \pm 0.6$  d post-conception (mean  $\pm$  SE treatment duration:  $9.1 \pm 0.1$  d) and females in the  
686 lactation control treatment group from  $4.9 \pm 0.4$  d to  $14.1 \pm 0.5$  d (treatment duration:  $9.2 \pm 0.5$

687 d). Given a ~35 d gestation period and a ~70 d lactation period in this population (Boutin et al.,  
688 unpub. data), our pregnancy treatments corresponded to treating females during the last trimester  
689 of gestation and into the first few days of lactation whereas our lactation treatments corresponded  
690 to early lactation before offspring begin to feed independently (they typically leave the nest on  
691 their own for the first time at ~35 d: Boutin et al., unpub. data). Note that this means that the  
692 lactation treatments occurred during a time when the offspring would not be able to consume any  
693 of the treatments themselves so any effects were due to the mother.

#### 694 *Statistical Analyses*

695 We assessed the effects of maternal treatments on litter survival from the first to second  
696 nest entry (proportion of pups present at both first and second nest entries) and litter size and  
697 litter sex ratio (proportion of litter composed of males) as recorded at the first and second nest  
698 entry using generalized linear mixed-effects models (GLMMs: litter survival and litter sex ratio,  
699 using binomial errors) or a linear mixed-effect model (LMM: litter size). Each of these separate  
700 models contained maternal treatment, birth date, and year as fixed effects. Models for lactation  
701 and pregnancy treatments were run separately. There was one litter where litter size at the second  
702 nest entry was greater than the at the first, likely because we missed a pup in the nest at the first  
703 nest entry, and we excluded this litter from our analyses. We confirmed that none of the GLMMs  
704 were overdispersed as all dispersion parameters were  $<1$  (0.48 to 0.72).

705

706

## 707 **Supplementary Results**

### 708 *Effects of Treatments on Litter Survival, Litter Size, & Litter Sex Ratio*

709 There was no evidence that treating mothers with GCs during pregnancy or lactation  
710 caused litter failure or altered litter size or litter sex ratio compared to the controls. For those  
711 mothers producing offspring until at least the first nest entry (occurring soon after pups were  
712 born), the proportion of the litter that survived from the first to the second nest entry did not  
713 differ between mothers treated with GCs during pregnancy (n = 42 litters, 51.8 ± 9% of total  
714 pups survived from the first to second nest entry) and the controls (n = 30 litters, 60 ± 8%,  $z = -$   
715 0.46,  $P = 0.65$ ), nor between mothers treated with GCs during lactation (n = 18 litters, 79.6 ± 8%  
716 pups survived) and the controls (n = 17 litters, 72.6 ± 9.5% pups survived,  $z = -0.67$ ,  $P = 0.5$ ).

717 Litter size did not differ between mothers treated with GCs during pregnancy or the  
718 controls at the first nest entry (Pregnancy GCs: n = 42 litters, 3.05 ± 0.14 pups, range = 1-5 pups;  
719 Pregnancy Controls: n = 31 litters, 2.84 ± 0.16 pups, range = 1-5 pups, effect of treatment,  $t_{67} =$   
720 0.58,  $P = 0.56$ ) nor at the second nest entry (Pregnancy GCs: n = 23 litters, 2.87 ± 0.22 pups,  
721 range = 1-5 pups; Pregnancy Controls: n = 21 litters, 2.71 ± 0.16 pups, range = 1-4 pups, effect  
722 of treatment,  $t_{38} = 0.18$ ,  $P = 0.85$ ). Litter size also did not differ between mothers treated with  
723 GCs during lactation or the controls at the first nest entry (Lactation GCs: n = 18 litters, 2.62 ±  
724 0.2 pups, range = 1-4 pups; Lactation Controls: n = 17 litters, 2.93 ± 0.13 pups, range = 2-4 pups,  
725 effect of treatment,  $t_{30} = -1.17$ ,  $P = 0.25$ ), nor at the second nest entry (Lactation GCs: n = 16  
726 litters, 2.25 ± 0.2 pups, range = 1-3 pups; Lactation Controls: n = 14 litters, 2.57 ± 0.2 pups,  
727 range = 1-4 pup, effect of treatment,  $t_{25} = -1.31$ ,  $P = 0.2$ ).

728 The litter sex ratio (proportion of males) at the first nest entry did not differ between  
729 mothers treated with GCs during pregnancy or the controls (Pregnancy GCs: n = 42 litters, 53 ±

730 4% males; Pregnancy Controls:  $n = 30$  litters,  $41.8 \pm 5\%$  males, effect of treatment:  $z = 0.49$ ,  $P =$   
731  $0.63$ ), nor at the second nest entry (Pregnancy GCs:  $n = 23$  litters,  $67.9 \pm 12\%$  males; Pregnancy  
732 Controls:  $n = 20$  litters,  $47.5 \pm 6\%$  males, effect of treatment:  $z = 0.32$ ,  $P = 0.75$ ). Similarly, the  
733 litter sex ratio at the first nest entry did not differ between mothers treated with GCs during  
734 lactation or the controls (Lactation GCs:  $n = 18$  litters,  $43.5 \pm 7.7\%$  males; Lactation Controls:  $n$   
735  $= 17$  litters,  $45.8 \pm 8.7\%$  males, effect of treatment:  $z = 0.002$ ,  $P = 0.99$ ) nor at the second nest  
736 entry (Lactation GCs:  $n = 16$  litters,  $48.1 \pm 8.8\%$  males; Lactation Controls:  $n = 14$  litters,  $56.4 \pm$   
737  $10\%$  males, effect of treatment:  $z = -0.48$ ,  $P = 0.63$ ).

738

739  
740  
741  
742  
743  
744  
745

**Table S1. Results from principal component analyses to derive axes of variation of oxidative stress state in weaned pups.** For each principal component shown, high values correspond to lower oxidative stress levels as they reflect samples with low levels of two (Blood PC2, Liver PC1) or one (Heart PC2) antioxidants (total antioxidant capacity, superoxide dismutase) and for heart tissue, higher levels of oxidative protein damage (protein carbonyls).

| <b>Measurement</b>              | <b>Tissue</b>    |                  |                  |
|---------------------------------|------------------|------------------|------------------|
|                                 | <b>Blood PC2</b> | <b>Heart PC2</b> | <b>Liver PC1</b> |
| Total Antioxidant Capacity      | -0.57            | -0.004           | -0.70            |
| Superoxide Dismutase            | -0.82            | -0.69            | -0.70            |
| Protein Carbonyls               | 0.03             | 0.71             | 0.09             |
| <b>Prop. Variance Explained</b> | <b>34.3%</b>     | <b>34.3%</b>     | <b>38.5%</b>     |

746  
747  
748

749 **Table S2. Effects of treating female red squirrels with glucocorticoids (GCs) during**  
 750 **pregnancy on offspring postnatal growth (A) and structural size (B).** Offspring growth is the  
 751 linear change in body mass from ~1 d to ~25 d of age. Offspring size is a composite variable  
 752 where high scores of PC1 correspond to offspring (one estimate of size obtained at ~25 d of age)  
 753 with larger zygomatic arch widths and longer hind foot lengths. Models contained random  
 754 intercept term for litter identity (growth model:  $\sigma^2 = 0.07$ ; size model:  $\sigma^2 = 0.19$ ).  
 755

(A)

| Offspring trait | Variable                                 | b            | SE          | t            | df          | P-value           |
|-----------------|------------------------------------------|--------------|-------------|--------------|-------------|-------------------|
| <b>Growth</b>   | <b>Intercept (2012, Control, Female)</b> | <b>1.86</b>  | <b>0.12</b> | <b>15.2</b>  | <b>35.6</b> | <b>&lt;0.0001</b> |
|                 | Year (2015)                              | -0.17        | 0.2         | -0.85        | 34.4        | 0.4               |
|                 | <b>Year (2016)</b>                       | <b>-0.63</b> | <b>0.13</b> | <b>-4.74</b> | <b>34.2</b> | <b>&lt;0.0001</b> |
|                 | <b>Year (2017)</b>                       | <b>-0.77</b> | <b>0.12</b> | <b>-6.4</b>  | <b>34.4</b> | <b>&lt;0.0001</b> |
|                 | <b>Sex (Male)</b>                        | <b>0.07</b>  | <b>0.03</b> | <b>2.09</b>  | <b>72.9</b> | <b>0.04</b>       |
|                 | Birth date                               | -0.003       | 0.05        | -0.06        | 34.5        | 0.95              |
|                 | Litter size                              | 0.12         | 0.07        | 1.66         | 35.6        | 0.11              |
|                 | <b>Treatment (GCs)</b>                   | <b>0.27</b>  | <b>0.09</b> | <b>3.04</b>  | <b>41.6</b> | <b>0.004</b>      |
|                 | Treatment (GCs) x Sex (Male)             | -0.08        | 0.05        | -1.64        | 74.1        | 0.1               |
|                 | Treatment (GCs) x Litter size            | -0.15        | 0.1         | -1.47        | 35.8        | 0.15              |

Results based upon 114 offspring from 43 litters across 4 years

(B)

| Offspring trait   | Variable                          | b           | SE          | t            | df          | P-value      |
|-------------------|-----------------------------------|-------------|-------------|--------------|-------------|--------------|
| <b>Size (PC1)</b> | Intercept (2015, Control, Female) | -0.04       | 0.4         | -0.1         | 32.3        | 0.92         |
|                   | <b>Year (2016)</b>                | <b>-1.0</b> | <b>0.41</b> | <b>-2.42</b> | <b>29.1</b> | <b>0.022</b> |
|                   | Year (2017)                       | -0.02       | 0.41        | -0.06        | 29.4        | 0.95         |
|                   | Sex (Male)                        | 0.26        | 0.15        | 1.68         | 59.6        | 0.1          |
|                   | Birth date                        | 0.16        | 0.11        | 1.43         | 26          | 0.16         |
|                   | Litter size                       | 0.02        | 0.21        | 0.09         | 33.2        | 0.93         |
|                   | Treatment (GCs)                   | 0.11        | 0.25        | 0.43         | 44.5        | 0.67         |
|                   | Treatment (GCs) x Sex (Male)      | -0.09       | 0.22        | -0.42        | 60.8        | 0.67         |
|                   | Treatment (GCs) x Litter size     | -0.21       | 0.27        | -0.76        | 32.2        | 0.45         |

Results based upon 88 offspring from 34 litters across 3 years

756  
 757  
 758  
 759  
 760  
 761  
 762  
 763

764 **Table S3. Effects of treating female red squirrels with GCs during (A) pregnancy or (B)**  
 765 **lactation on offspring haematocrit levels (packed red blood cell volume) collected from**  
 766 **weaned offspring.** Results for the pregnancy model contained random intercept term for litter  
 767 identity (pregnancy:  $\sigma^2 = 19$ ) whereas results for the lactation model are from a general linear  
 768 model.  
 769

(A)

| Variable                                 | b           | SE         | t           | df          | P-value           |
|------------------------------------------|-------------|------------|-------------|-------------|-------------------|
| <b>Intercept (2015, Control, Female)</b> | <b>47.4</b> | <b>2.9</b> | <b>16.1</b> | <b>18.2</b> | <b>&lt;0.0001</b> |
| Year (2016)                              | -6.1        | 3.4        | -1.82       | 17.4        | 0.085             |
| Year (2017)                              | -5.8        | 3.1        | -1.83       | 17          | 0.085             |
| Sex (Male)                               | 1.91        | 1.1        | 1.74        | 16.7        | 0.1               |
| Birth date                               | -0.07       | 1.2        | -0.06       | 18.9        | 0.95              |
| Growth                                   | -1.2        | 1.4        | -0.84       | 29.7        | 0.41              |
| Litter size                              | -0.58       | 1.2        | -0.48       | 17.9        | 0.64              |
| Treatment (GCs)                          | 0.11        | 2.2        | 0.05        | 20.1        | 0.96              |
| Treatment (GCs) x Growth                 | 1.73        | 2.3        | 0.74        | 29.2        | 0.46              |

Results based upon 39 offspring from 25 litters across 3 years

(B)

| Variable                                 | b            | SE         | t           | df        | P-value           |
|------------------------------------------|--------------|------------|-------------|-----------|-------------------|
| <b>Intercept (2015, Control, Female)</b> | <b>45.3</b>  | <b>2.4</b> | <b>18.5</b> | <b>15</b> | <b>&lt;0.0001</b> |
| <b>Year (2016)</b>                       | <b>-7.42</b> | <b>2.9</b> | <b>-2.6</b> | <b>15</b> | <b>0.02</b>       |
| Year (2017)                              | -3.83        | 2.2        | -1.74       | 15        | 0.1               |
| <b>Sex (Male)</b>                        | <b>4.98</b>  | <b>1.9</b> | <b>2.6</b>  | <b>15</b> | <b>0.02</b>       |
| <b>Birth date</b>                        | <b>3.94</b>  | <b>1.7</b> | <b>2.35</b> | <b>15</b> | <b>0.033</b>      |
| Growth                                   | -1.62        | 1.7        | -1.29       | 15        | 0.21              |
| Litter size                              | 3.1          | 1.9        | 1.65        | 15        | 0.12              |
| Treatment (GCs)                          | 2.12         | 2.4        | 0.89        | 15        | 0.39              |
| Treatment (GCs) x Growth                 | 2.72         | 2.1        | 1.27        | 15        | 0.22              |

Results based upon 24 offspring from 16 litters across 3 years

770  
 771  
 772

773 **Table S4. Effects of treating pregnant red squirrels with GCs on oxidative stress levels in**  
 774 **(A) blood, (B) heart, and (C) liver tissue from weaned offspring.** High PC scores correspond  
 775 to low levels of antioxidants and, for heart, higher levels of protein damage (see Table 1).  
 776 Models for blood and liver tissues contained random intercept term for litter ID (blood:  $\sigma^2 = 0.3$ ;  
 777 liver:  $\sigma^2 = 0.03$ ).  
 778

| (A) | Offspring trait | Variable                          | b     | SE   | t     | df    | P-value |
|-----|-----------------|-----------------------------------|-------|------|-------|-------|---------|
|     | Blood PC2       | Intercept (2015, Control, Female) | 0.09  | 0.47 | 0.19  | 12.3  | 0.85    |
|     |                 | Year (2016)                       | -0.2  | 0.56 | -0.36 | 12.8  | 0.72    |
|     |                 | Year (2017)                       | -0.2  | 0.52 | -0.38 | 12.2  | 0.71    |
|     |                 | Sex (Male)                        | 0.58  | 0.28 | 2.02  | 23.9  | 0.055   |
|     |                 | Birth date                        | -0.39 | 0.2  | -1.92 | 17.6  | 0.071   |
|     |                 | Growth                            | 0.02  | 0.29 | 0.08  | 21.5  | 0.93    |
|     |                 | Litter size                       | -0.38 | 0.21 | -1.85 | 16.9  | 0.08    |
|     |                 | Treatment (GCs)                   | -0.19 | 0.38 | -0.5  | 15.1  | 0.62    |
|     |                 | Treatment (GCs) x Growth          | -0.86 | 0.45 | -1.9  | 19.06 | 0.071   |

  

| (B) | Offspring trait | Variable                                 | b           | SE          | t           | df        | P-value      |
|-----|-----------------|------------------------------------------|-------------|-------------|-------------|-----------|--------------|
|     | Heart PC2       | <b>Intercept (2015, Control, Female)</b> | <b>-1.1</b> | <b>0.46</b> | <b>-2.4</b> | <b>32</b> | <b>0.022</b> |
|     |                 | <b>Year (2016)</b>                       | <b>1.3</b>  | <b>0.55</b> | <b>2.37</b> | <b>32</b> | <b>0.024</b> |
|     |                 | Year (2017)                              | 0.94        | 0.5         | 1.86        | 32        | 0.072        |
|     |                 | Sex (Male)                               | -0.08       | 0.35        | -0.23       | 32        | 0.82         |
|     |                 | Birth date                               | 0.25        | 0.21        | 1.22        | 32        | 0.23         |
|     |                 | Growth                                   | -0.07       | 0.3         | -0.23       | 32        | 0.81         |
|     |                 | Litter size                              | 0.4         | 0.21        | 1.88        | 32        | 0.07         |
|     |                 | Treatment (GCs)                          | 0.49        | 0.38        | 1.3         | 32        | 0.2          |
|     |                 | Treatment (GCs) x Growth                 | 0.45        | 0.47        | 0.98        | 32        | 0.34         |

  

| (C) | Offspring trait | Variable                                 | b            | SE          | t            | df          | P-value       |
|-----|-----------------|------------------------------------------|--------------|-------------|--------------|-------------|---------------|
|     | Liver PC1       | <b>Intercept (2015, Control, Female)</b> | <b>-0.91</b> | <b>0.33</b> | <b>-2.79</b> | <b>11.8</b> | <b>0.016</b>  |
|     |                 | Year (2016)                              | 0.44         | 0.4         | 1.15         | 12.2        | 0.27          |
|     |                 | <b>Year (2017)</b>                       | <b>1.78</b>  | <b>0.36</b> | <b>4.9</b>   | <b>11.5</b> | <b>0.0004</b> |
|     |                 | Sex (Male)                               | 0.01         | 0.24        | 0.08         | 29.3        | 0.94          |
|     |                 | Birth date                               | 0.08         | 0.15        | 0.53         | 17.5        | 0.6           |
|     |                 | Growth                                   | -0.04        | 0.2         | -0.17        | 17.3        | 0.86          |
|     |                 | Litter size                              | 0.04         | 0.15        | 0.28         | 17.9        | 0.78          |
|     |                 | Treatment (GCs)                          | -0.45        | 0.27        | -1.66        | 13.8        | 0.12          |
|     |                 | Treatment (GCs) x Growth                 | -0.47        | 0.32        | -1.44        | 16.1        | 0.17          |

Results from 41 offspring from 26 litters over 3 years.

779



780 **Table S5. Effects of treating female red squirrels with GCs during (A) pregnancy or (B)**  
 781 **lactation on liver telomere lengths (kb) of weaned offspring.** Telomeres measured in DNA  
 782 from liver tissue using the TRF method. Models contained random intercept term for litter  
 783 identity (pregnancy:  $\sigma^2 = 1.2$ ; lactation:  $\sigma^2 = 6.6$ ).  
 784

(A)

| Variable                                 | b            | SE          | t            | df          | P-value           |
|------------------------------------------|--------------|-------------|--------------|-------------|-------------------|
| <b>Intercept (2015, Control, Female)</b> | <b>20.06</b> | <b>1.26</b> | <b>16.08</b> | <b>15.9</b> | <b>&lt;0.0001</b> |
| <b>Year (2016)</b>                       | <b>4.06</b>  | <b>1.4</b>  | <b>2.92</b>  | <b>13.4</b> | <b>0.012</b>      |
| Year (2017)                              | -2.63        | 1.6         | -1.61        | 20.7        | 0.12              |
| Sex (Male)                               | 0.38         | 0.77        | 0.49         | 26.5        | 0.62              |
| Birth date                               | 0.61         | 0.51        | 1.21         | 18.5        | 0.24              |
| Growth                                   | -0.3         | 0.72        | -0.43        | 19.3        | 0.68              |
| Litter size                              | -0.39        | 0.52        | -0.75        | 18          | 0.46              |
| Liver PC1                                | 0.25         | 0.58        | 0.43         | 30.6        | 0.67              |
| Treatment (GCs)                          | 0.87         | 0.97        | 0.9          | 16.3        | 0.38              |
| Treatment (GCs) x Growth                 | 0.9          | 1.15        | 0.78         | 19.1        | 0.44              |

Results based upon 41 offspring from 26 litters across 3 years

(B)

| Variable                                 | b           | SE          | t           | df          | P-value           |
|------------------------------------------|-------------|-------------|-------------|-------------|-------------------|
| <b>Intercept (2015, Control, Female)</b> | <b>19.2</b> | <b>1.97</b> | <b>9.75</b> | <b>14.1</b> | <b>&lt;0.0001</b> |
| <b>Year (2016)</b>                       | <b>2.1</b>  | <b>2.7</b>  | <b>0.79</b> | <b>10.6</b> | <b>0.45</b>       |
| Year (2017)                              | 0.13        | 2.6         | 0.05        | 15          | 0.96              |
| Sex (Male)                               | 0.22        | 0.92        | 0.24        | 10.2        | 0.82              |
| Birth date                               | 0.11        | 1.16        | 0.1         | 11.2        | 0.92              |
| Growth                                   | 0.01        | 0.82        | 0.02        | 16.9        | 0.99              |
| Litter size                              | 0.68        | 1.56        | 0.44        | 10.9        | 0.67              |
| Liver PC1                                | -0.44       | 0.79        | -0.56       | 15.8        | 0.58              |
| Treatment (GCs)                          | 0.47        | 1.5         | 0.32        | 10.7        | 0.75              |
| Treatment (GCs) x Growth                 | 1.13        | 1.15        | 0.98        | 16.9        | 0.34              |

Results based upon 27 offspring from 18 litters across 3 years

785  
 786  
 787  
 788  
 789  
 790  
 791  
 792  
 793  
 794  
 795  
 796

797 **Table S6. Effects of treating female red squirrels with GCs during lactation on offspring**  
 798 **postnatal growth (A) and structural (skeletal) size (B).** Offspring growth is the linear change  
 799 in body mass from ~1 d to ~25 d of age. Offspring size is a composite variable where high scores  
 800 of PC1 correspond to offspring (~25 d of age) with larger zygomatic arch widths and longer hind  
 801 foot lengths. Models contained random intercept term for litter identity (growth model:  $\sigma^2 =$   
 802 0.22; size model:  $\sigma^2 = 0.69$ ).  
 803

(A)

| Offspring trait | Variable                                 | b           | SE          | t            | df          | P-value           |
|-----------------|------------------------------------------|-------------|-------------|--------------|-------------|-------------------|
| <b>Growth</b>   | <b>Intercept (2015, Control, Female)</b> | <b>1.89</b> | <b>0.2</b>  | <b>10.5</b>  | <b>25.4</b> | <b>&lt;0.0001</b> |
|                 | Year (2016)                              | -0.11       | 0.37        | -0.3         | 22.2        | 0.77              |
|                 | Year (2017)                              | -0.27       | 0.19        | -1.42        | 22.6        | 0.17              |
|                 | Sex (Male)                               | -0.006      | 0.06        | -0.09        | 41.2        | 0.92              |
|                 | <b>Birth date</b>                        | <b>0.23</b> | <b>0.1</b>  | <b>2.37</b>  | <b>22.5</b> | <b>0.027</b>      |
|                 | Litter size                              | 0.11        | 0.18        | 0.6          | 22.6        | 0.55              |
|                 | <b>Treatment (GCs)</b>                   | <b>-0.4</b> | <b>0.19</b> | <b>-2.14</b> | <b>26.4</b> | <b>0.04</b>       |
|                 | Treatment (GCs) x Sex (Male)             | 0.09        | 0.08        | 1.05         | 41.2        | 0.3               |
|                 | Treatment (GCs) x Litter size            | -0.006      | 0.21        | -0.03        | 22.8        | 0.97              |

Results based upon 72 offspring from 30 litters across 3 years

(B)

| Offspring trait   | Variable                          | b           | SE          | t           | df          | P-value      |
|-------------------|-----------------------------------|-------------|-------------|-------------|-------------|--------------|
| <b>Size (PC1)</b> | Intercept (2015, Control, Female) | 0.07        | 0.35        | 0.2         | 41.6        | 0.84         |
|                   | Year (2016)                       | 0.04        | 0.6         | 0.07        | 18.2        | 0.94         |
|                   | <b>Year (2017)</b>                | <b>0.7</b>  | <b>0.31</b> | <b>2.27</b> | <b>22.6</b> | <b>0.033</b> |
|                   | Sex (Male)                        | 0.24        | 0.29        | 0.82        | 47.5        | 0.41         |
|                   | <b>Birth date</b>                 | <b>0.46</b> | <b>0.15</b> | <b>2.98</b> | <b>21.5</b> | <b>0.007</b> |
|                   | Litter size                       | -0.02       | 0.29        | -0.08       | 23.4        | 0.93         |
|                   | Treatment (GCs)                   | -0.53       | 0.37        | -1.44       | 41.9        | 0.16         |
|                   | Treatment (GCs) x Sex (Male)      | -0.04       | 0.37        | -0.1        | 45.6        | 0.92         |
|                   | Treatment (GCs) x Litter size     | 0.5         | 0.34        | 1.45        | 23.9        | 0.16         |

Results based upon 67 offspring from 30 litters across 3 years

804

805

806 **Table S7. Effects of treating lactating red squirrels with GCs on oxidative stress levels in**  
 807 **(A) blood, (B) heart, and (C) liver tissue from weaned offspring.** High PC scores correspond  
 808 to low levels of antioxidants and, in heart tissue, higher levels of protein damage (Table 1). The  
 809 model for liver contained a random intercept term for litter identity (liver:  $\sigma^2 = 0.32$ ).  
 810

(A)

| Offspring trait  | Variable                          | b     | SE   | t     | df | P-value |
|------------------|-----------------------------------|-------|------|-------|----|---------|
| <b>Blood PC2</b> | Intercept (2015, Control, Female) | 0.19  | 0.55 | 0.35  | 18 | 0.73    |
|                  | Year (2016)                       | -0.25 | 0.7  | -0.35 | 18 | 0.73    |
|                  | Year (2017)                       | -0.75 | 0.55 | -1.36 | 18 | 0.19    |
|                  | Sex (Male)                        | -0.49 | 0.46 | -1.06 | 18 | 0.3     |
|                  | Birth date                        | -0.15 | 0.35 | -0.42 | 18 | 0.68    |
|                  | Growth                            | 0.34  | 0.31 | 1.08  | 18 | 0.29    |
|                  | Litter size                       | -0.37 | 0.45 | -0.83 | 18 | 0.42    |
|                  | Treatment (GCs)                   | 0.53  | 0.44 | 1.2   | 18 | 0.24    |
|                  | Treatment (GCs) x Growth          | -0.22 | 0.42 | -0.53 | 18 | 0.6     |

(B)

| Offspring trait  | Variable                          | b     | SE   | t     | df | P-value |
|------------------|-----------------------------------|-------|------|-------|----|---------|
| <b>Heart PC2</b> | Intercept (2015, Control, Female) | -1.2  | 0.43 | -2.8  | 18 | 0.012   |
|                  | Year (2016)                       | 0.75  | 0.55 | 1.36  | 18 | 0.19    |
|                  | Year (2017)                       | 0.98  | 0.43 | 2.3   | 18 | 0.03    |
|                  | Sex (Male)                        | 0.33  | 0.36 | 0.91  | 18 | 0.37    |
|                  | Birth date                        | 0.2   | 0.27 | 0.75  | 18 | 0.46    |
|                  | Growth                            | -0.02 | 0.24 | -0.1  | 18 | 0.92    |
|                  | Litter size                       | 0.24  | 0.35 | 0.69  | 18 | 0.5     |
|                  | Treatment (GCs)                   | 0.61  | 0.34 | 1.79  | 18 | 0.09    |
|                  | Treatment (GCs) x Growth          | -0.23 | 0.32 | -0.72 | 18 | 0.48    |

(C)

| Offspring trait  | Variable                                 | b            | SE          | t            | df          | P-value       |
|------------------|------------------------------------------|--------------|-------------|--------------|-------------|---------------|
| <b>Liver PC1</b> | <b>Intercept (2015, Control, Female)</b> | <b>-1.34</b> | <b>0.43</b> | <b>-3.11</b> | <b>12.1</b> | <b>0.009</b>  |
|                  | Year (2016)                              | 0.99         | 0.63        | 1.56         | 8.7         | 0.15          |
|                  | <b>Year (2017)</b>                       | <b>2.32</b>  | <b>0.46</b> | <b>9.91</b>  | <b>5.08</b> | <b>0.0005</b> |
|                  | Sex (Male)                               | -0.03        | 0.3         | -0.1         | 14.2        | 0.92          |
|                  | Birth date                               | -0.23        | 0.3         | -0.79        | 10.4        | 0.44          |
|                  | Growth                                   | -0.22        | 0.23        | -0.95        | 17.9        | 0.35          |
|                  | Litter size                              | -0.47        | 0.38        | -1.24        | 9.8         | 0.24          |
|                  | Treatment (GCs)                          | -0.08        | 0.37        | -0.22        | 9.9         | 0.83          |
|                  | Treatment (GCs) x Growth                 | -0.04        | 0.32        | -0.12        | 15.6        | 0.9           |

Results from 27 offspring from 18 litters over 3 years.

811  
 812  
 813
